# Supplementary material for: Identification of synthetic lethality of PRKDC in MYC-dependent human cancers by pooled shRNA screening
Source: PubMed Central journal article supplement (PMC4320452; doi:10.1186/1471-2407-14-944), 2014-12-13
Supplement: 12885_2014_5171_MOESM1_ESM.pdf [file 12885_2014_5171_MOESM1_ESM.pdf]

| target       | Symbol       | pCDH |       | pCDH-L-MYC1 |       | pCDH-L-MYC2 |       |
|--------------|--------------|------|-------|-------------|-------|-------------|-------|
|              |              | Day1 | Day14 | Day1        | Day14 | Day1        | Day14 |
| NM_006201    | CDK16        | 1078 | 2013  | 1072        | 0     | 894         | 561   |
| NM_001798    | <b>CDK2</b>  | 826  | 485   | 558         | 0     | 921         | 539   |
| NM_001433    | ERN1         | 744  | 486   | 794         | 0     | 645         | 1360  |
| NM_002093    | <b>GSK3B</b> | 981  | 834   | 773         | 0     | 466         | 726   |
| NM_001080434 | LMTK3        | 892  | 1330  | 668         | 0     | 591         | 272   |
| NM_000294    | PHKG2        | 595  | 1599  | 530         | 0     | 510         | 483   |
| NM_006254    | PRKCD        | 562  | 984   | 932         | 0     | 822         | 279   |
| NM_033126    | PSKH2        | 719  | 837   | 788         | 0     | 1048        | 570   |
| NM_012224    | NEK1         | 959  | 210   | 1085        | 0     | 509         | 584   |
| NM_001025105 | CSNK1A1      | 591  | 0     | 704         | 0     | 502         | 2275  |
| NM_001081640 | <b>PRKDC</b> | 250  | 842   | 668         | 0     | 444         | 1402  |
| NM_000906    | NPR1         | 857  | 292   | 660         | 0     | 723         | 666   |
| NM_006852    | TLK2         | 711  | 0     | 962         | 0     | 860         | 1258  |
| NM_004672    | MAP3K6       | 438  | 0     | 858         | 0     | 1163        | 597   |
| NM_003942    | RPS6KA4      | 444  | 996   | 605         | 0     | 240         | 605   |
| NM_001522    | GUCY2F       | 538  | 297   | 502         | 0     | 566         | 285   |
| NM_007118    | TRIO         | 218  | 798   | 553         | 0     | 282         | 0     |
| NM_014791    | MELK         | 283  | 202   | 623         | 0     | 496         | 54    |
| NM_003010    | MAP2K4       | 236  | 79    | 868         | 0     | 191         | 395   |
| NM_005607    | PTK2         | 226  | 0     | 844         | 0     | 264         | 243   |
| NM_014586    | HUNK         | 91   | 60    | 687         | 0     | 80          | 48    |
| NM_002227    | JAK1         | 423  | 0     | 719         | 18    | 544         | 1236  |
| NM_005990    | STK10        | 1369 | 1182  | 1161        | 19    | 737         | 2441  |
| NM_182493    | MYLK3        | 648  | 545   | 843         | 21    | 847         | 397   |
| NM_002612    | PDK4         | 233  | 251   | 709         | 22    | 447         | 324   |
| NM_004329    | BMPR1A       | 300  | 758   | 519         | 24    | 276         | 966   |
| NM_173500    | TTBK2        | 795  | 55    | 828         | 26    | 439         | 182   |
| NM_004333    | BRAF         | 932  | 983   | 983         | 30    | 1277        | 777   |
| NM_181358    | HIPK1        | 768  | 344   | 1004        | 33    | 556         | 384   |
| NM_004935    | CDK5         | 556  | 395   | 701         | 37    | 465         | 356   |
| NM_199289    | NEK5         | 506  | 515   | 893         | 51    | 286         | 471   |
| NM_152835    | PDIK1L       | 882  | 427   | 769         | 51    | 477         | 252   |
| NM_005813    | PRKD3        | 486  | 1611  | 671         | 56    | 750         | 36    |
| NM_002019    | FLT1         | 524  | 210   | 667         | 63    | 710         | 647   |
| NM_005813    | PRKD3        | 811  | 749   | 606         | 84    | 949         | 1250  |
| NM_001699    | AXL          | 869  | 412   | 1186        | 85    | 833         | 1021  |
| NM_022048    | CSNK1G1      | 1023 | 537   | 1843        | 89    | 645         | 1189  |
| NM_001161565 | TNIK         | 445  | 900   | 1485        | 108   | 626         | 521   |
| NM_182398    | RPS6KA5      | 784  | 1730  | 1388        | 123   | 973         | 707   |
| NM_016276    | SGK2         | 1237 | 761   | 908         | 128   | 771         | 321   |
| NM_000075    | CDK4         | 1432 | 880   | 972         | 134   | 1388        | 962   |
| NM_006622    | PLK2         | 980  | 1009  | 592         | 138   | 699         | 101   |
| NM_015083    | CDK12        | 966  | 620   | 767         | 143   | 790         | 463   |
| NM_139012    | MAPK14       | 932  | 1035  | 751         | 163   | 784         | 121   |
| NM_015906    | TRIM33       | 1084 | 1167  | 943         | 165   | 1048        | 455   |

|              |          |      |      |      |     |      |      |
|--------------|----------|------|------|------|-----|------|------|
| NM_005781    | TNK2     | 169  | 0    | 543  | 167 | 304  | 382  |
| NM_022048    | CSNK1G1  | 635  | 117  | 673  | 169 | 401  | 626  |
| NM_002740    | PRKCI    | 387  | 551  | 652  | 175 | 660  | 218  |
| NM_015148    | PASK     | 640  | 503  | 982  | 177 | 581  | 907  |
| NM_001204    | BMPR2    | 1044 | 1044 | 657  | 181 | 972  | 1215 |
| NM_001128921 | MARK3    | 1445 | 1330 | 1428 | 186 | 766  | 0    |
| NM_001079882 | PRKD2    | 784  | 1400 | 568  | 194 | 1087 | 1222 |
| NM_005975    | PTK6     | 555  | 850  | 730  | 197 | 318  | 499  |
| NM_006374    | STK25    | 90   | 302  | 525  | 201 | 434  | 688  |
| NM_006201    | CDK16    | 581  | 1359 | 552  | 203 | 1045 | 1793 |
| NM_001114122 | CHEK1    | 752  | 1012 | 1158 | 207 | 212  | 1860 |
| NM_001348    | DAPK3    | 908  | 722  | 750  | 212 | 1297 | 485  |
| NM_033141    | MAP3K9   | 626  | 275  | 557  | 215 | 890  | 726  |
| NM_002747    | MAPK4    | 337  | 933  | 889  | 216 | 659  | 1634 |
| NM_213647    | FGFR4    | 463  | 385  | 540  | 217 | 768  | 76   |
| NM_173354    | SIK1     | 576  | 781  | 1026 | 218 | 593  | 556  |
| NM_001004057 | GRK4     | 1426 | 480  | 1140 | 226 | 1009 | 487  |
| NM_001433    | ERN1     | 273  | 17   | 752  | 228 | 422  | 766  |
| NM_031417    | MARK4    | 1051 | 713  | 632  | 233 | 580  | 1051 |
| NM_006575    | MAP4K5   | 583  | 287  | 1185 | 238 | 890  | 767  |
| NM_006035    | CDC42BPB | 1110 | 720  | 1321 | 239 | 1058 | 943  |
| NM_005160    | ADRBK2   | 280  | 22   | 649  | 246 | 400  | 1146 |
| NM_001204    | BMPR2    | 831  | 1267 | 505  | 249 | 1422 | 1707 |
| NM_004333    | BRAF     | 501  | 577  | 574  | 259 | 607  | 288  |
| NM_002880    | RAF1     | 676  | 1071 | 779  | 259 | 890  | 864  |
| NM_003957    | BRSK2    | 913  | 1293 | 1253 | 261 | 468  | 766  |
| NM_001111033 | ACVR1C   | 544  | 165  | 1459 | 262 | 747  | 805  |
| NM_005204    | MAP3K8   | 1204 | 1357 | 1478 | 266 | 866  | 108  |
| NM_005012    | ROR1     | 1266 | 705  | 791  | 266 | 388  | 2126 |
| NM_032028    | TSSK1B   | 811  | 928  | 1004 | 267 | 591  | 68   |
| NM_004196    | CDKL1    | 826  | 1294 | 778  | 269 | 621  | 563  |
| NM_002031    | FRK      | 408  | 795  | 1082 | 270 | 524  | 278  |
| NM_000142    | FGFR3    | 573  | 142  | 677  | 270 | 890  | 749  |
| NM_015000    | STK38L   | 1469 | 1167 | 1487 | 271 | 825  | 1045 |
| NM_014911    | AAK1     | 385  | 617  | 599  | 272 | 168  | 81   |
| NM_005356    | LCK      | 1353 | 552  | 1034 | 277 | 983  | 1497 |
| NM_006281    | STK3     | 944  | 556  | 510  | 277 | 491  | 871  |
| NM_001136138 | RPS6KC1  | 1014 | 755  | 897  | 278 | 1397 | 0    |
| NM_213647    | FGFR4    | 845  | 820  | 736  | 282 | 1024 | 550  |
| NM_006374    | STK25    | 1799 | 1002 | 1486 | 282 | 1324 | 2174 |
| NM_000459    | TEK      | 308  | 863  | 559  | 289 | 240  | 205  |
| NM_017525    | CDC42BPG | 412  | 545  | 660  | 293 | 339  | 1336 |
| NM_002497    | NEK2     | 1101 | 789  | 1111 | 294 | 660  | 802  |
| NM_018650    | MARK1    | 752  | 1184 | 739  | 298 | 537  | 363  |
| NM_007118    | TRIO     | 613  | 210  | 917  | 298 | 362  | 1127 |
| NM_172082    | CAMK2B   | 81   | 105  | 729  | 298 | 150  | 147  |
| NM_015905    | TRIM24   | 571  | 396  | 535  | 305 | 833  | 298  |

|              |         |      |      |      |     |      |      |
|--------------|---------|------|------|------|-----|------|------|
| NM_016653    | ZAK     | 791  | 1740 | 889  | 305 | 858  | 1252 |
| NM_207519    | ZAP70   | 839  | 208  | 675  | 313 | 910  | 483  |
| NM_015906    | TRIM33  | 561  | 53   | 711  | 317 | 350  | 127  |
| NM_145185    | MAP2K7  | 1104 | 1813 | 597  | 320 | 765  | 821  |
| NM_004441    | EPHB1   | 1300 | 1265 | 1237 | 323 | 824  | 1251 |
| NM_001025105 | CSNK1A1 | 837  | 350  | 1462 | 326 | 1116 | 1009 |
| NM_006742    | PSKH1   | 657  | 375  | 795  | 329 | 1187 | 1171 |
| NM_003993    | CLK2    | 1193 | 846  | 678  | 337 | 1093 | 55   |
| NM_139355    | MATK    | 530  | 559  | 609  | 337 | 297  | 381  |
| NM_001013703 | EIF2AK4 | 483  | 432  | 1242 | 344 | 852  | 162  |
| NM_033266    | ERN2    | 901  | 1880 | 1860 | 349 | 1560 | 1550 |
| NM_001018066 | NTRK2   | 960  | 803  | 539  | 350 | 1349 | 288  |
| NM_203351    | MAP3K3  | 928  | 1465 | 1238 | 354 | 1033 | 422  |
| NM_006852    | TLK2    | 1283 | 1050 | 770  | 355 | 1685 | 485  |
| NM_005372    | MOS     | 591  | 269  | 737  | 356 | 1320 | 237  |
| NM_006258    | PRKG1   | 473  | 563  | 1051 | 360 | 776  | 313  |
| NM_182398    | RPS6KA5 | 1252 | 225  | 1250 | 364 | 966  | 749  |
| NM_004073    | PLK3    | 1345 | 589  | 510  | 364 | 739  | 221  |
| NM_005592    | MUSK    | 761  | 18   | 837  | 365 | 465  | 579  |
| NM_005417    | SRC     | 737  | 2006 | 1160 | 377 | 726  | 618  |
| NM_004958    | MTOR    | 1102 | 794  | 1202 | 379 | 1303 | 1592 |
| NM_024046    | CAMKV   | 788  | 1134 | 918  | 380 | 860  | 147  |
| NM_013233    | STK39   | 711  | 469  | 551  | 380 | 708  | 1131 |
| NM_005308    | GRK5    | 1078 | 2290 | 1231 | 384 | 1627 | 1333 |
| NM_001142386 | PDK3    | 905  | 260  | 1127 | 385 | 1185 | 618  |
| NM_001619    | ADRBK1  | 1258 | 1908 | 1062 | 386 | 966  | 378  |
| NM_014840    | NUAK1   | 1106 | 1010 | 1075 | 387 | 753  | 1141 |
| NM_004327    | BCR     | 829  | 725  | 878  | 388 | 1148 | 890  |
| NM_139355    | MATK    | 1240 | 898  | 1132 | 389 | 977  | 1562 |
| NM_007271    | STK38   | 925  | 1871 | 696  | 392 | 1049 | 1094 |
| NM_001005735 | CHEK2   | 1505 | 422  | 877  | 395 | 324  | 1408 |
| NM_003845    | DYRK4   | 410  | 102  | 643  | 395 | 949  | 186  |
| NM_175866    | UHMK1   | 655  | 981  | 668  | 399 | 843  | 238  |
| NM_017572    | MKNK2   | 498  | 907  | 1125 | 401 | 414  | 682  |
| NM_001896    | CSNK2A2 | 390  | 124  | 607  | 403 | 295  | 213  |
| NM_001077401 | ACVRL1  | 643  | 469  | 975  | 407 | 735  | 844  |
| NM_033126    | PSKH2   | 533  | 1060 | 998  | 409 | 585  | 942  |
| NM_024652    | LRRK1   | 870  | 197  | 807  | 411 | 826  | 633  |
| NM_005417    | SRC     | 639  | 625  | 527  | 413 | 341  | 404  |
| NM_145686    | MAP4K4  | 613  | 867  | 792  | 415 | 994  | 449  |
| NM_001081563 | DMPK    | 1605 | 1462 | 1111 | 416 | 1376 | 1666 |
| NM_014226    | RAGE    | 1321 | 1184 | 878  | 418 | 684  | 300  |
| NM_001012331 | NTRK1   | 1185 | 50   | 1121 | 421 | 1068 | 421  |
| NM_053006    | TSSK2   | 1333 | 775  | 951  | 422 | 777  | 2096 |
| NM_003215    | TEC     | 1382 | 1340 | 1019 | 426 | 1099 | 3225 |
| NM_002944    | ROS1    | 2239 | 1843 | 1961 | 429 | 1694 | 2911 |
| NM_014720    | SLK     | 708  | 1206 | 896  | 430 | 835  | 1699 |

|              |           |      |      |      |     |      |      |
|--------------|-----------|------|------|------|-----|------|------|
| NM_206907    | PRKAA1    | 1463 | 1392 | 1821 | 432 | 1189 | 316  |
| NM_002751    | MAPK11    | 1141 | 1068 | 1337 | 436 | 1368 | 721  |
| NM_002754    | MAPK13    | 1336 | 407  | 1212 | 439 | 617  | 1152 |
| NM_002755    | MAP2K1    | 942  | 501  | 612  | 446 | 683  | 31   |
| NM_001106    | ACVR2B    | 1212 | 549  | 1243 | 452 | 1000 | 296  |
| NM_015016    | MAST3     | 661  | 340  | 747  | 453 | 620  | 1201 |
| NM_139070    | MAPK9     | 1004 | 203  | 770  | 460 | 677  | 303  |
| NM_021643    | TRIB2     | 928  | 809  | 864  | 470 | 1131 | 523  |
| NM_005211    | CSF1R     | 577  | 2255 | 888  | 471 | 374  | 451  |
| NM_002419    | MAP3K11   | 623  | 217  | 638  | 473 | 186  | 676  |
| NM_032237    | SGK196    | 392  | 325  | 600  | 475 | 446  | 1010 |
| NM_001172303 | MASTL     | 1330 | 1119 | 1116 | 480 | 1393 | 633  |
| NM_212502    | CDK18     | 210  | 0    | 502  | 484 | 66   | 73   |
| NM_001099439 | EPHA10    | 762  | 988  | 804  | 485 | 606  | 983  |
| NM_001799    | CDK7      | 1220 | 1194 | 1169 | 487 | 1188 | 775  |
| NM_005781    | TNK2      | 530  | 991  | 1074 | 488 | 1275 | 575  |
| XM_496486    | GNF087948 | 479  | 734  | 524  | 489 | 656  | 363  |
| NM_031464    | RPS6KL1   | 398  | 460  | 532  | 490 | 807  | 164  |
| NM_014602    | PIK3R4    | 1228 | 741  | 932  | 494 | 803  | 1000 |
| NM_002595    | CDK17     | 722  | 749  | 657  | 495 | 525  | 1457 |
| NM_002576    | PAK1      | 882  | 972  | 1210 | 504 | 719  | 641  |
| NM_001111067 | ACVR1     | 665  | 210  | 752  | 504 | 791  | 501  |
| NM_001127190 | CSK       | 605  | 715  | 1046 | 505 | 861  | 1448 |
| NM_145203    | CSNK1A1L  | 409  | 417  | 1298 | 506 | 898  | 52   |
| NM_030952    | NUAK2     | 776  | 584  | 737  | 507 | 1103 | 409  |
| NM_006293    | TYRO3     | 1204 | 1640 | 1254 | 508 | 516  | 2736 |
| NM_002648    | PIM1      | 427  | 36   | 587  | 511 | 920  | 632  |
| NM_001319    | CSNK1G2   | 545  | 540  | 625  | 519 | 670  | 1028 |
| NM_004439    | EPHA5     | 814  | 0    | 1188 | 520 | 853  | 616  |
| NM_001044722 | CSNK1G3   | 611  | 806  | 615  | 522 | 1116 | 694  |
| NM_001048218 | SCYL1     | 287  | 838  | 621  | 522 | 253  | 724  |
| NM_001172303 | MASTL     | 166  | 1168 | 898  | 528 | 643  | 865  |
| NM_030662    | MAP2K2    | 849  | 1139 | 1133 | 529 | 913  | 473  |
| NM_004721    | MAP3K13   | 755  | 530  | 920  | 534 | 555  | 1204 |
| NM_001099436 | ULK3      | 618  | 440  | 786  | 535 | 433  | 123  |
| NM_173174    | PTK2B     | 657  | 653  | 1160 | 537 | 777  | 1190 |
| NM_005308    | GRK5      | 912  | 620  | 912  | 537 | 870  | 449  |
| NM_004972    | JAK2      | 1274 | 546  | 948  | 537 | 834  | 513  |
| NM_033115    | TBCK      | 990  | 1884 | 1881 | 544 | 1932 | 2609 |
| NM_014496    | RPS6KA6   | 812  | 558  | 1415 | 545 | 861  | 2188 |
| NM_032538    | TTBK1     | 664  | 1032 | 873  | 545 | 909  | 1023 |
| NM_006258    | PRKG1     | 1101 | 167  | 663  | 545 | 551  | 1139 |
| NM_001014834 | PAK4      | 1254 | 144  | 998  | 547 | 1315 | 1141 |
| NM_004329    | BMPR1A    | 166  | 598  | 1156 | 547 | 535  | 797  |
| NM_004329    | BMPR1A    | 1152 | 632  | 561  | 549 | 469  | 200  |
| NM_002612    | PDK4      | 532  | 1096 | 1238 | 553 | 727  | 671  |
| NM_198578    | LRRK2     | 904  | 163  | 887  | 554 | 419  | 755  |

|              |              |      |      |      |     |      |      |
|--------------|--------------|------|------|------|-----|------|------|
| NM_006213    | PHKG1        | 1400 | 312  | 1819 | 555 | 862  | 1776 |
| NM_001040056 | MAPK3        | 775  | 1194 | 854  | 555 | 434  | 1494 |
| NM_033266    | ERN2         | 1720 | 1313 | 991  | 557 | 1212 | 439  |
| NM_002609    | PDGFRB       | 613  | 792  | 686  | 558 | 310  | 454  |
| NM_005232    | EPHA1        | 962  | 902  | 901  | 562 | 1117 | 600  |
| NM_171825    | CAMK2A       | 1317 | 1119 | 991  | 566 | 980  | 773  |
| NM_004963    | GUCY2C       | 586  | 472  | 697  | 569 | 757  | 953  |
| NM_005424    | TIE1         | 451  | 496  | 648  | 572 | 499  | 521  |
| NM_033116    | NEK9         | 582  | 594  | 514  | 573 | 577  | 212  |
| NM_002929    | GRK1         | 1411 | 1450 | 561  | 574 | 1671 | 2453 |
| NM_000180    | GUCY2D       | 727  | 1814 | 1066 | 577 | 1343 | 789  |
| NM_172129    | CAMK2D       | 845  | 1080 | 559  | 579 | 692  | 1032 |
| NM_001128628 | PAK6         | 692  | 378  | 1100 | 581 | 778  | 594  |
| NM_001166171 | NEK6         | 1024 | 1435 | 794  | 590 | 860  | 792  |
| NM_001111097 | LYN          | 619  | 567  | 675  | 590 | 843  | 985  |
| NM_004439    | EPHA5        | 1413 | 4237 | 982  | 598 | 1258 | 2637 |
| NM_005465    | AKT3         | 272  | 91   | 773  | 601 | 480  | 265  |
| NM_001042452 | RP6-213H19.1 | 1722 | 2417 | 1179 | 605 | 2079 | 1637 |
| NM_003318    | TTK          | 659  | 841  | 865  | 607 | 422  | 448  |
| NM_001162407 | CLK1         | 625  | 1174 | 552  | 609 | 1122 | 566  |
| NM_004431    | EPHA2        | 922  | 617  | 1936 | 612 | 807  | 550  |
| NM_002755    | MAP2K1       | 1318 | 1108 | 1601 | 614 | 930  | 695  |
| NM_001081640 | PRKDC        | 1603 | 1495 | 2481 | 622 | 2004 | 1164 |
| NM_052841    | TSSK3        | 740  | 287  | 568  | 623 | 630  | 883  |
| NM_001619    | ADRBK1       | 1077 | 465  | 947  | 624 | 777  | 590  |
| NM_139209    | GRK7         | 942  | 1235 | 768  | 627 | 938  | 654  |
| NM_003157    | NEK4         | 423  | 887  | 814  | 628 | 427  | 1095 |
| NM_032435    | KIAA1804     | 732  | 677  | 905  | 629 | 877  | 1650 |
| NM_021135    | RPS6KA2      | 1070 | 737  | 863  | 630 | 1074 | 817  |
| NM_032960    | MAPKAPK2     | 746  | 298  | 702  | 634 | 1042 | 1317 |
| NM_001081640 | PRKDC        | 842  | 627  | 837  | 635 | 1472 | 983  |
| NM_145109    | MAP2K3       | 344  | 1460 | 1335 | 636 | 667  | 452  |
| NM_003957    | BRSK2        | 341  | 322  | 505  | 638 | 495  | 1124 |
| NM_145331    | MAP3K7       | 359  | 1151 | 1347 | 640 | 612  | 398  |
| NM_005157    | ABL1         | 780  | 812  | 859  | 640 | 467  | 382  |
| NM_182493    | MYLK3        | 1171 | 869  | 1249 | 641 | 1017 | 741  |
| NM_021158    | TRIB3        | 1250 | 1142 | 1268 | 643 | 1507 | 1710 |
| NM_138370    | PKDCC        | 305  | 897  | 504  | 645 | 587  | 651  |
| NM_001166695 | SLC1A3       | 788  | 276  | 904  | 645 | 473  | 731  |
| NM_030662    | MAP2K2       | 536  | 1302 | 602  | 648 | 662  | 122  |
| NM_003160    | AURKC        | 369  | 569  | 515  | 649 | 568  | 1008 |
| NM_002419    | MAP3K11      | 1511 | 1469 | 1152 | 654 | 1061 | 791  |
| NM_021133    | RNASEL       | 1225 | 1725 | 1001 | 655 | 1297 | 2067 |
| NM_012290    | TLK1         | 992  | 771  | 1141 | 655 | 771  | 971  |
| NM_145331    | MAP3K7       | 1580 | 540  | 2082 | 656 | 1600 | 647  |
| NM_006285    | TESK1        | 935  | 130  | 709  | 658 | 705  | 769  |
| NM_031965    | GSG2         | 1529 | 620  | 998  | 661 | 955  | 789  |

|              |          |      |      |      |     |      |      |
|--------------|----------|------|------|------|-----|------|------|
| NM_022048    | CSNK1G1  | 1129 | 2353 | 1251 | 666 | 1963 | 1578 |
| NM_001166171 | NEK6     | 862  | 775  | 850  | 668 | 856  | 658  |
| NM_002611    | PDK2     | 734  | 393  | 951  | 669 | 1128 | 1399 |
| NM_001184    | ATR      | 747  | 386  | 554  | 670 | 1139 | 1009 |
| NM_006875    | PIM2     | 493  | 0    | 694  | 672 | 336  | 65   |
| NM_001170761 | SRPK3    | 1393 | 164  | 851  | 673 | 998  | 1862 |
| NM_152835    | PDIK1L   | 1257 | 828  | 1190 | 677 | 1430 | 267  |
| NM_003496    | TRRAP    | 1518 | 2120 | 1668 | 678 | 1490 | 2505 |
| NM_002748    | MAPK6    | 1263 | 1576 | 1669 | 679 | 1893 | 1372 |
| NM_001113239 | HIPK2    | 1400 | 1133 | 1115 | 684 | 1707 | 523  |
| NM_014975    | MAST1    | 961  | 1335 | 1120 | 684 | 863  | 1209 |
| NM_003565    | ULK1     | 1504 | 1621 | 1432 | 686 | 1608 | 979  |
| NM_153047    | FYN      | 1500 | 343  | 669  | 692 | 793  | 988  |
| NM_007271    | STK38    | 1276 | 1074 | 1629 | 694 | 1528 | 814  |
| NM_014572    | LATS2    | 898  | 1369 | 648  | 694 | 774  | 605  |
| NM_016281    | TAOK3    | 2181 | 2261 | 2723 | 699 | 1827 | 2592 |
| NM_031464    | RPS6KL1  | 625  | 2502 | 1539 | 700 | 1146 | 1545 |
| NM_000875    | IGF1R    | 751  | 682  | 844  | 704 | 766  | 68   |
| NM_005906    | MAK      | 877  | 1028 | 706  | 709 | 551  | 274  |
| NM_002497    | NEK2     | 1161 | 660  | 1213 | 710 | 627  | 324  |
| NM_145109    | MAP2K3   | 577  | 279  | 1056 | 710 | 772  | 979  |
| NM_001799    | CDK7     | 1015 | 773  | 777  | 715 | 1171 | 859  |
| NM_000459    | TEK      | 1450 | 773  | 1809 | 718 | 963  | 986  |
| NM_004560    | ROR2     | 1037 | 850  | 561  | 723 | 708  | 439  |
| NM_002754    | MAPK13   | 870  | 763  | 759  | 723 | 1063 | 574  |
| NM_182691    | SRPK2    | 390  | 691  | 650  | 724 | 834  | 1097 |
| NM_015083    | CDK12    | 995  | 1011 | 1419 | 725 | 798  | 1127 |
| NM_001099436 | ULK3     | 603  | 438  | 756  | 728 | 579  | 810  |
| NM_020439    | CAMK1G   | 677  | 906  | 634  | 735 | 512  | 861  |
| NM_001111067 | ACVR1    | 1380 | 744  | 1411 | 738 | 1509 | 908  |
| NM_016653    | ZAK      | 1264 | 1339 | 1169 | 738 | 751  | 2051 |
| NM_003384    | VRK1     | 1081 | 1967 | 1074 | 738 | 963  | 548  |
| NM_001111097 | LYN      | 669  | 1238 | 1160 | 739 | 1190 | 1322 |
| NM_006241    | PPP1R2   | 1527 | 1705 | 1702 | 740 | 1674 | 2311 |
| NM_001005862 | ERBB2    | 578  | 420  | 968  | 743 | 718  | 641  |
| NM_001259    | CDK6     | 513  | 276  | 708  | 743 | 593  | 1001 |
| NM_001165969 | STRADA   | 706  | 955  | 639  | 745 | 697  | 724  |
| NM_002031    | FRK      | 1379 | 648  | 620  | 746 | 1727 | 1013 |
| NM_001160367 | CDK10    | 751  | 1363 | 1459 | 746 | 1103 | 706  |
| NM_003821    | RIPK2    | 494  | 255  | 592  | 747 | 195  | 810  |
| NM_003954    | MAP3K14  | 1112 | 2128 | 1855 | 749 | 1719 | 2073 |
| NM_004635    | MAPKAPK3 | 577  | 553  | 757  | 750 | 609  | 1124 |
| NM_001032296 | STK24    | 1474 | 1225 | 1070 | 752 | 723  | 1808 |
| NM_053006    | TSSK2    | 742  | 1527 | 1118 | 753 | 933  | 479  |
| NM_002227    | JAK1     | 981  | 691  | 866  | 754 | 618  | 605  |
| NM_005592    | MUSK     | 953  | 138  | 937  | 755 | 755  | 1176 |
| NM_001122957 | BCKDK    | 760  | 566  | 1065 | 758 | 453  | 73   |

|              |         |      |      |      |     |      |      |
|--------------|---------|------|------|------|-----|------|------|
| NM_032037    | TSSK6   | 1186 | 346  | 701  | 761 | 1062 | 442  |
| NM_015083    | CDK12   | 1420 | 887  | 843  | 761 | 449  | 864  |
| NM_182925    | FLT4    | 574  | 25   | 767  | 761 | 671  | 671  |
| NM_020975    | RET     | 729  | 491  | 835  | 762 | 254  | 0    |
| NM_020639    | RIPK4   | 1175 | 229  | 579  | 764 | 704  | 816  |
| NM_007199    | IRAK3   | 1663 | 1578 | 1905 | 767 | 1421 | 2511 |
| NM_005921    | MAP3K1  | 1092 | 971  | 1584 | 769 | 905  | 188  |
| NM_004938    | DAPK1   | 373  | 1822 | 595  | 769 | 607  | 645  |
| NM_014586    | HUNK    | 847  | 1002 | 1303 | 771 | 773  | 1441 |
| NM_013254    | TBK1    | 1768 | 1152 | 1856 | 772 | 1829 | 511  |
| NM_001170761 | SRPK3   | 1017 | 662  | 775  | 780 | 683  | 1403 |
| NM_172129    | CAMK2D  | 1096 | 618  | 1814 | 782 | 1045 | 453  |
| NM_012395    | CDK14   | 1948 | 622  | 1345 | 786 | 2358 | 512  |
| NM_001203    | BMPR1B  | 1308 | 1983 | 906  | 788 | 622  | 1713 |
| NM_139021    | MAPK15  | 940  | 1010 | 711  | 788 | 826  | 1170 |
| NM_003496    | TRRAP   | 908  | 287  | 1462 | 789 | 585  | 495  |
| NM_002880    | RAF1    | 518  | 1144 | 702  | 790 | 902  | 1152 |
| NM_198465    | NRK     | 1366 | 2564 | 803  | 795 | 1730 | 1692 |
| NM_005308    | GRK5    | 414  | 17   | 793  | 796 | 543  | 910  |
| NM_005921    | MAP3K1  | 815  | 168  | 777  | 797 | 863  | 424  |
| NM_002880    | RAF1    | 1561 | 1442 | 2255 | 799 | 762  | 1128 |
| NM_004972    | JAK2    | 1507 | 1115 | 1409 | 799 | 1648 | 387  |
| NM_020341    | PAK7    | 1524 | 479  | 1781 | 800 | 1033 | 71   |
| NM_004963    | GUCY2C  | 774  | 1215 | 1071 | 808 | 1087 | 1020 |
| NM_004439    | EPHA5   | 1146 | 615  | 877  | 810 | 1239 | 1268 |
| NM_002613    | PDPK1   | 911  | 952  | 849  | 811 | 457  | 645  |
| NM_014791    | MELK    | 1157 | 966  | 1312 | 812 | 922  | 905  |
| NM_139034    | MAPK7   | 279  | 228  | 655  | 812 | 396  | 986  |
| NM_017572    | MKNK2   | 923  | 276  | 1052 | 813 | 1582 | 942  |
| NM_145109    | MAP2K3  | 911  | 1258 | 1166 | 815 | 650  | 825  |
| NR_026557    | PLK5P   | 710  | 1442 | 1600 | 827 | 802  | 84   |
| NM_138995    | MYO3B   | 301  | 109  | 853  | 828 | 458  | 653  |
| NM_001114182 | IRAK4   | 312  | 325  | 508  | 831 | 284  | 527  |
| NM_172082    | CAMK2B  | 1177 | 586  | 800  | 832 | 1153 | 1128 |
| NM_182398    | RPS6KA5 | 3072 | 2945 | 2273 | 836 | 1581 | 821  |
| NM_003010    | MAP2K4  | 136  | 34   | 679  | 838 | 411  | 0    |
| NM_001009565 | CDKL4   | 400  | 829  | 509  | 839 | 306  | 997  |
| NM_015112    | MAST2   | 853  | 1464 | 1032 | 845 | 772  | 451  |
| NM_015905    | TRIM24  | 1062 | 874  | 560  | 846 | 741  | 1087 |
| NM_015092    | SMG1    | 1904 | 1711 | 1278 | 858 | 1536 | 850  |
| NM_015112    | MAST2   | 1939 | 973  | 1416 | 860 | 1283 | 990  |
| NM_000245    | MET     | 486  | 103  | 1013 | 860 | 1307 | 1437 |
| NM_018650    | MARK1   | 833  | 52   | 701  | 860 | 756  | 1000 |
| NM_001168238 | ABL2    | 1027 | 585  | 1288 | 861 | 1143 | 207  |
| NM_018650    | MARK1   | 952  | 1465 | 675  | 870 | 1466 | 704  |
| NM_001001671 | MAP3K15 | 1138 | 717  | 1253 | 870 | 951  | 0    |
| NM_032017    | STK40   | 521  | 762  | 1000 | 876 | 661  | 1468 |

|              |          |      |      |      |     |      |      |
|--------------|----------|------|------|------|-----|------|------|
| NM_003993    | CLK2     | 439  | 1100 | 1260 | 877 | 780  | 169  |
| NM_002741    | PKN1     | 1166 | 1113 | 1003 | 881 | 763  | 639  |
| NM_006871    | RIPK3    | 910  | 1534 | 1322 | 882 | 997  | 285  |
| NM_181093    | SCYL3    | 761  | 228  | 863  | 885 | 522  | 576  |
| NM_020639    | RIPK4    | 1127 | 1234 | 1986 | 886 | 1139 | 1572 |
| NM_003159    | CDKL5    | 789  | 963  | 1120 | 888 | 480  | 1038 |
| NM_001042599 | ERBB4    | 1815 | 126  | 1481 | 892 | 857  | 647  |
| NM_139047    | MAPK8    | 904  | 1583 | 1461 | 893 | 876  | 986  |
| NM_182687    | PKMYT1   | 912  | 1102 | 1200 | 894 | 971  | 2053 |
| NM_033116    | NEK9     | 881  | 989  | 1266 | 894 | 614  | 1588 |
| NM_207519    | ZAP70    | 296  | 1155 | 954  | 898 | 962  | 203  |
| NM_004444    | EPHB4    | 1052 | 941  | 1595 | 902 | 1408 | 1201 |
| NM_024776    | SGK269   | 1027 | 768  | 2059 | 902 | 921  | 1314 |
| NM_019884    | GSK3A    | 1316 | 1994 | 1569 | 904 | 1544 | 1028 |
| NM_145001    | STK32A   | 926  | 2389 | 1876 | 904 | 1293 | 1640 |
| NM_003952    | RPS6KB2  | 1284 | 1033 | 981  | 905 | 1886 | 1395 |
| NM_033116    | NEK9     | 604  | 376  | 686  | 906 | 1184 | 1389 |
| NM_017672    | TRPM7    | 803  | 648  | 1171 | 908 | 1958 | 1877 |
| NM_003913    | PRPF4B   | 1422 | 1403 | 1484 | 910 | 1349 | 1311 |
| NM_014975    | MAST1    | 1123 | 899  | 656  | 910 | 955  | 1110 |
| NM_001012418 | MYLK4    | 1163 | 2262 | 1345 | 911 | 1106 | 971  |
| NM_004196    | CDKL1    | 999  | 924  | 956  | 911 | 924  | 612  |
| NM_031965    | GSG2     | 978  | 994  | 1360 | 914 | 768  | 908  |
| NM_000061    | BTK      | 553  | 941  | 916  | 915 | 735  | 459  |
| NM_212502    | CDK18    | 603  | 18   | 585  | 915 | 951  | 605  |
| NM_020439    | CAMK1G   | 1035 | 1191 | 924  | 916 | 774  | 1326 |
| NM_018979    | WNK1     | 764  | 109  | 1392 | 918 | 1069 | 1236 |
| NM_006575    | MAP4K5   | 931  | 1022 | 993  | 919 | 455  | 973  |
| NM_004635    | MAPKAPK3 | 1622 | 1899 | 846  | 920 | 1043 | 1275 |
| NM_003993    | CLK2     | 849  | 1202 | 1971 | 923 | 1041 | 1169 |
| NM_007170    | TESK2    | 1362 | 1328 | 1490 | 926 | 760  | 169  |
| NM_080823    | SRMS     | 867  | 482  | 1259 | 929 | 891  | 932  |
| NM_006648    | WNK2     | 884  | 640  | 1142 | 936 | 666  | 929  |
| NM_006875    | PIM2     | 532  | 589  | 580  | 940 | 823  | 900  |
| NM_001170639 | CDK20    | 996  | 569  | 592  | 941 | 847  | 1874 |
| NM_002610    | PDK1     | 504  | 1048 | 866  | 949 | 760  | 653  |
| NM_002969    | MAPK12   | 799  | 63   | 906  | 949 | 799  | 0    |
| NM_015191    | SIK2     | 942  | 12   | 1678 | 953 | 864  | 1359 |
| NM_001109891 | MAPK3    | 1156 | 212  | 2130 | 954 | 979  | 1414 |
| NM_020328    | ACVR1B   | 1831 | 935  | 2192 | 955 | 1582 | 1208 |
| NM_014215    | INSRR    | 1490 | 1173 | 1982 | 957 | 1663 | 1315 |
| NM_198892    | BMP2K    | 831  | 1115 | 1004 | 958 | 874  | 1127 |
| NM_004443    | EPHB3    | 1219 | 397  | 918  | 963 | 792  | 1367 |
| NM_033403    | DCLK3    | 1351 | 800  | 1502 | 965 | 1062 | 1073 |
| NM_001018066 | NTRK2    | 654  | 1543 | 752  | 970 | 940  | 1346 |
| NM_002419    | MAP3K11  | 903  | 902  | 1106 | 973 | 988  | 250  |
| NM_170709    | SGK3     | 746  | 18   | 605  | 978 | 188  | 1260 |



|              |          |      |      |      |      |      |      |
|--------------|----------|------|------|------|------|------|------|
| NM_001556    | IKBKB    | 436  | 1091 | 1031 | 979  | 267  | 1427 |
| NM_080836    | STK35    | 1209 | 2179 | 1502 | 982  | 1301 | 1932 |
| NM_182925    | FLT4     | 898  | 632  | 595  | 985  | 857  | 706  |
| NR_028062    | PRKY     | 1068 | 1188 | 766  | 990  | 823  | 525  |
| NM_207518    | PRKACA   | 660  | 1232 | 673  | 990  | 1259 | 453  |
| NM_032960    | MAPKAPK2 | 1158 | 650  | 1558 | 993  | 2121 | 1204 |
| NM_207578    | PRKACB   | 1691 | 565  | 829  | 994  | 1768 | 502  |
| NM_003957    | BRSK2    | 972  | 608  | 1088 | 996  | 1216 | 2182 |
| NM_001893    | CSNK1D   | 945  | 614  | 877  | 996  | 486  | 1337 |
| NM_005372    | MOS      | 1412 | 809  | 1326 | 998  | 1193 | 1045 |
| NM_175866    | UHMK1    | 897  | 318  | 748  | 998  | 782  | 1025 |
| NM_001032296 | STK24    | 1118 | 813  | 622  | 1001 | 616  | 225  |
| NM_001077401 | ACVRL1   | 1194 | 926  | 1277 | 1003 | 1643 | 3190 |
| NM_005372    | MOS      | 1490 | 1026 | 520  | 1003 | 1096 | 718  |
| NM_001142610 | ULK2     | 1118 | 2202 | 860  | 1016 | 1324 | 1879 |
| NM_013392    | NRBP1    | 398  | 446  | 759  | 1016 | 1265 | 581  |
| NM_003331    | TYK2     | 1055 | 1195 | 1776 | 1017 | 919  | 1459 |
| NM_001001852 | PIM3     | 854  | 727  | 734  | 1019 | 803  | 1321 |
| NM_001128628 | PAK6     | 559  | 381  | 1019 | 1026 | 1087 | 1171 |
| NM_003582    | DYRK3    | 1699 | 1347 | 695  | 1032 | 1602 | 2156 |
| NM_020791    | TAOK1    | 712  | 798  | 1198 | 1032 | 1371 | 888  |
| NM_172129    | CAMK2D   | 1605 | 2194 | 1463 | 1039 | 1501 | 1099 |
| NM_016276    | SGK2     | 703  | 531  | 971  | 1039 | 982  | 926  |
| NM_001744    | CAMK4    | 1626 | 548  | 1103 | 1040 | 849  | 582  |
| NM_002821    | PTK7     | 927  | 1579 | 1266 | 1044 | 853  | 1483 |
| NM_021643    | TRIB2    | 772  | 446  | 1358 | 1045 | 693  | 0    |
| NM_153498    | CAMK1D   | 1217 | 579  | 1575 | 1047 | 1690 | 1059 |
| NM_139047    | MAPK8    | 477  | 943  | 1189 | 1053 | 931  | 1395 |
| NM_001570    | IRAK2    | 931  | 754  | 1593 | 1055 | 1035 | 213  |
| NM_001081563 | DMPK     | 587  | 1255 | 822  | 1056 | 968  | 328  |
| NM_001654    | ARAF     | 371  | 954  | 774  | 1056 | 381  | 1460 |
| NM_002577    | PAK2     | 1229 | 1959 | 2076 | 1058 | 910  | 578  |
| NM_017662    | TRPM6    | 1497 | 2103 | 967  | 1058 | 1113 | 1161 |
| NM_002610    | PDK1     | 557  | 2720 | 891  | 1058 | 539  | 1065 |
| NM_173575    | STK32C   | 1021 | 664  | 1018 | 1058 | 1327 | 1427 |
| NM_002446    | MAP3K10  | 966  | 284  | 1250 | 1063 | 1286 | 407  |
| NM_003242    | TGFBR2   | 2939 | 2144 | 1455 | 1064 | 2519 | 2772 |
| NM_001278    | CHUK     | 805  | 1466 | 1043 | 1065 | 711  | 715  |
| NM_007170    | TESK2    | 637  | 1095 | 1202 | 1067 | 956  | 1013 |
| NM_025195    | TRIB1    | 814  | 941  | 958  | 1070 | 1228 | 1891 |
| NM_015690    | STK36    | 393  | 935  | 677  | 1072 | 785  | 682  |
| NM_030906    | STK33    | 1347 | 578  | 728  | 1077 | 494  | 515  |
| NM_001048200 | HIPK3    | 832  | 1342 | 1010 | 1078 | 733  | 1461 |
| NM_000875    | IGF1R    | 555  | 417  | 802  | 1081 | 621  | 61   |
| NM_001014795 | ILK      | 372  | 680  | 829  | 1082 | 601  | 472  |
| NM_030952    | NUAK2    | 1520 | 1835 | 2334 | 1089 | 1507 | 1208 |
| NM_020666    | CLK4     | 406  | 272  | 774  | 1092 | 733  | 1083 |

|              |           |      |      |      |      |      |      |
|--------------|-----------|------|------|------|------|------|------|
| NM_004336    | BUB1      | 1799 | 1634 | 2243 | 1103 | 2148 | 1300 |
| NM_080836    | STK35     | 832  | 936  | 772  | 1105 | 1192 | 1073 |
| NM_016440    | VRK3      | 902  | 215  | 672  | 1105 | 1094 | 968  |
| NM_001113239 | HIPK2     | 2006 | 1468 | 1112 | 1112 | 1350 | 1841 |
| NM_001172131 | HCK       | 1088 | 1152 | 795  | 1112 | 979  | 493  |
| NM_021135    | RPS6KA2   | 776  | 332  | 678  | 1113 | 1355 | 566  |
| NM_198892    | BMP2K     | 1543 | 1051 | 1379 | 1115 | 1128 | 481  |
| NM_006575    | MAP4K5    | 506  | 617  | 1107 | 1124 | 610  | 266  |
| NM_004226    | STK17B    | 773  | 615  | 1194 | 1125 | 680  | 717  |
| NM_014002    | IKBKE     | 1185 | 95   | 1613 | 1127 | 1091 | 895  |
| NM_003159    | CDKL5     | 999  | 1458 | 986  | 1127 | 809  | 725  |
| NM_001222    | CAMK2G    | 1051 | 207  | 812  | 1129 | 574  | 351  |
| NM_003656    | CAMK1     | 580  | 436  | 543  | 1130 | 915  | 1720 |
| NM_001128173 | PAK3      | 901  | 1441 | 1064 | 1131 | 764  | 928  |
| NM_013233    | STK39     | 679  | 231  | 668  | 1131 | 484  | 833  |
| NM_001135740 | PNCK      | 1295 | 890  | 1593 | 1132 | 1444 | 1977 |
| NM_004440    | EPHA7     | 1694 | 510  | 2113 | 1137 | 674  | 1296 |
| NM_199289    | NEK5      | 585  | 891  | 963  | 1139 | 411  | 514  |
| NM_001005915 | ERBB3     | 1200 | 1178 | 1563 | 1158 | 1783 | 1028 |
| XM_067723    | GNF090716 | 576  | 302  | 1180 | 1159 | 704  | 503  |
| NM_001040261 | DCLK2     | 555  | 1221 | 641  | 1160 | 741  | 702  |
| NM_002758    | MAP2K6    | 1275 | 2619 | 1212 | 1161 | 930  | 922  |
| NM_001008910 | STK16     | 1382 | 728  | 1399 | 1164 | 1034 | 912  |
| NM_006285    | TESK1     | 925  | 1202 | 1200 | 1169 | 1229 | 743  |
| NM_005228    | EGFR      | 851  | 935  | 2234 | 1170 | 1392 | 1557 |
| NM_031480    | RIOK1     | 2369 | 479  | 1057 | 1175 | 2155 | 822  |
| NM_007118    | TRIO      | 1076 | 1741 | 809  | 1176 | 1469 | 1645 |
| NM_153498    | CAMK1D    | 499  | 1087 | 873  | 1179 | 926  | 1104 |
| NM_001044722 | CSNK1G3   | 979  | 728  | 2087 | 1181 | 571  | 1099 |
| NM_004734    | DCLK1     | 1142 | 954  | 816  | 1181 | 1516 | 997  |
| NM_001113239 | HIPK2     | 938  | 1289 | 967  | 1181 | 983  | 448  |
| NM_153499    | CAMKK2    | 1076 | 425  | 1338 | 1182 | 1851 | 760  |
| NM_002929    | GRK1      | 1131 | 1067 | 1292 | 1183 | 996  | 1425 |
| NM_053006    | TSSK2     | 826  | 362  | 948  | 1184 | 766  | 1716 |
| NM_139078    | MAPKAPK5  | 1378 | 1231 | 1887 | 1185 | 1783 | 1281 |
| NM_003582    | DYRK3     | 961  | 1288 | 1872 | 1185 | 1453 | 1914 |
| NM_001142386 | PDK3      | 455  | 11   | 718  | 1185 | 403  | 423  |
| NM_033493    | CDK11B    | 1210 | 1949 | 764  | 1192 | 1564 | 3653 |
| NM_005211    | CSF1R     | 1182 | 1321 | 899  | 1194 | 1041 | 783  |
| NM_021133    | RNASEL    | 573  | 924  | 819  | 1199 | 775  | 894  |
| NM_032538    | TTBK1     | 124  | 615  | 797  | 1199 | 304  | 385  |
| NM_032387    | WNK4      | 811  | 628  | 959  | 1202 | 633  | 1085 |
| NM_003948    | CDKL2     | 834  | 2301 | 2027 | 1205 | 1926 | 1414 |
| NM_015148    | PASK      | 1739 | 1984 | 1667 | 1209 | 1754 | 832  |
| NM_003157    | NEK4      | 503  | 146  | 530  | 1210 | 625  | 604  |
| NM_031267    | CDK13     | 998  | 1538 | 568  | 1212 | 541  | 817  |
| NM_015690    | STK36     | 1824 | 1446 | 1687 | 1216 | 2790 | 1801 |

|              |        |      |      |      |      |      |      |
|--------------|--------|------|------|------|------|------|------|
| NM_001018046 | YSK4   | 1065 | 2250 | 992  | 1224 | 1735 | 2417 |
| NM_001098623 | OBSCN  | 2216 | 1651 | 2166 | 1225 | 1519 | 1329 |
| NM_002648    | PIM1   | 1064 | 920  | 1302 | 1228 | 1249 | 765  |
| NM_006724    | MAP3K4 | 1451 | 41   | 640  | 1232 | 1221 | 593  |
| NM_004073    | PLK3   | 794  | 1259 | 872  | 1234 | 1282 | 1366 |
| NM_004938    | DAPK1  | 2030 | 2559 | 1656 | 1237 | 1366 | 2209 |
| NM_001012331 | NTRK1  | 1809 | 1774 | 2443 | 1237 | 1822 | 828  |
| NM_080823    | SRMS   | 576  | 959  | 782  | 1239 | 597  | 1064 |
| NM_001259    | CDK6   | 882  | 86   | 1050 | 1239 | 880  | 545  |
| NM_005204    | MAP3K8 | 1726 | 1041 | 1547 | 1246 | 943  | 2078 |
| NM_001009565 | CDKL4  | 1389 | 1608 | 2667 | 1261 | 1476 | 632  |
| NM_000142    | FGFR3  | 822  | 1110 | 2356 | 1267 | 1419 | 1927 |
| NM_018423    | STYK1  | 799  | 1021 | 1080 | 1267 | 1088 | 143  |
| NM_005546    | ITK    | 1376 | 1504 | 1307 | 1270 | 2123 | 1475 |
| NM_014586    | HUNK   | 1118 | 1995 | 2107 | 1279 | 809  | 1358 |
| NM_031267    | CDK13  | 428  | 1453 | 1758 | 1279 | 1316 | 899  |
| NM_001433    | ERN1   | 1840 | 1831 | 1924 | 1282 | 2149 | 1341 |
| NM_002958    | RYK    | 1994 | 880  | 2060 | 1288 | 927  | 1164 |
| NM_022965    | FGFR3  | 528  | 874  | 804  | 1288 | 572  | 360  |
| NM_144685    | HIPK4  | 1439 | 1601 | 1382 | 1289 | 1122 | 859  |
| NM_032037    | TSSK6  | 1815 | 1547 | 1594 | 1290 | 2380 | 1663 |
| NM_003384    | VRK1   | 424  | 439  | 558  | 1290 | 901  | 959  |
| NM_182644    | EPHA3  | 813  | 233  | 504  | 1290 | 447  | 29   |
| NM_006258    | PRKG1  | 1327 | 1965 | 1994 | 1293 | 711  | 1653 |
| NM_001012338 | NTRK3  | 1685 | 1935 | 1816 | 1299 | 1749 | 1524 |
| NM_002737    | PRKCA  | 2209 | 1135 | 1901 | 1299 | 1619 | 1348 |
| NM_032028    | TSSK1B | 269  | 1106 | 942  | 1301 | 241  | 726  |
| NM_006609    | MAP3K2 | 1893 | 2152 | 974  | 1313 | 1802 | 1932 |
| NM_025164    | SIK3   | 1395 | 1968 | 1423 | 1313 | 2320 | 640  |
| NM_001048218 | SCYL1  | 976  | 1200 | 1406 | 1318 | 1299 | 334  |
| NM_002610    | PDK1   | 366  | 592  | 519  | 1336 | 1134 | 0    |
| NM_014264    | PLK4   | 1312 | 2890 | 1152 | 1339 | 1982 | 1650 |
| NM_015183    | MAST4  | 2022 | 2132 | 1108 | 1341 | 1168 | 651  |
| NM_002739    | PRKCG  | 614  | 395  | 862  | 1347 | 1500 | 871  |
| NM_017662    | TRPM6  | 591  | 902  | 1162 | 1355 | 697  | 1645 |
| NM_016276    | SGK2   | 1129 | 1492 | 1228 | 1357 | 804  | 922  |
| NM_138292    | ATM    | 788  | 589  | 550  | 1367 | 406  | 1783 |
| NM_015183    | MAST4  | 1144 | 1177 | 1278 | 1371 | 792  | 1328 |
| NM_007174    | CIT    | 1838 | 1653 | 1726 | 1374 | 1440 | 861  |
| NM_207578    | PRKACB | 756  | 932  | 1259 | 1374 | 811  | 348  |
| NM_001014795 | ILK    | 681  | 427  | 1693 | 1376 | 465  | 557  |
| NM_003913    | PRPF4B | 1502 | 1325 | 1203 | 1377 | 2066 | 1473 |
| NM_002821    | PTK7   | 1872 | 1392 | 1397 | 1377 | 1553 | 1463 |
| NM_003318    | TTK    | 1427 | 977  | 1286 | 1383 | 576  | 538  |
| NM_002609    | PDGFRB | 1392 | 1742 | 1795 | 1387 | 1723 | 1594 |
| NM_005627    | SGK1   | 1203 | 946  | 1552 | 1389 | 1439 | 1930 |
| NM_006293    | TYRO3  | 1028 | 977  | 1004 | 1392 | 1193 | 1484 |

|              |           |      |      |      |      |      |      |
|--------------|-----------|------|------|------|------|------|------|
| NM_033403    | DCLK3     | 704  | 890  | 1373 | 1395 | 877  | 366  |
| NM_006259    | PRKG2     | 915  | 669  | 582  | 1403 | 627  | 1003 |
| NM_178564    | NRBP2     | 1264 | 1314 | 994  | 1405 | 1214 | 1808 |
| NM_016231    | NLK       | 1561 | 1104 | 1259 | 1412 | 2045 | 843  |
| NM_001024401 | SBK1      | 505  | 311  | 1519 | 1414 | 747  | 1453 |
| NM_139070    | MAPK9     | 1306 | 3421 | 1921 | 1416 | 1326 | 1136 |
| NM_152534    | GNF084368 | 387  | 0    | 1220 | 1418 | 553  | 940  |
| NM_001626    | AKT2      | 1163 | 1254 | 796  | 1418 | 1404 | 375  |
| NM_005417    | SRC       | 1285 | 966  | 1262 | 1419 | 1334 | 1164 |
| NM_015092    | SMG1      | 1289 | 1495 | 1272 | 1421 | 1558 | 1354 |
| NM_152720    | NEK3      | 993  | 1294 | 833  | 1421 | 666  | 1304 |
| NM_005569    | LIMK2     | 1179 | 1380 | 1532 | 1426 | 1037 | 949  |
| NM_003821    | RIPK2     | 1836 | 3041 | 1180 | 1426 | 2539 | 2112 |
| NM_002031    | FRK       | 1632 | 737  | 1200 | 1427 | 1511 | 823  |
| NM_015191    | SIK2      | 1496 | 1617 | 784  | 1439 | 1435 | 1117 |
| NM_015016    | MAST3     | 1367 | 1372 | 1642 | 1442 | 1296 | 1159 |
| NM_002745    | MAPK1     | 855  | 464  | 1784 | 1442 | 753  | 988  |
| NM_006622    | PLK2      | 1521 | 1256 | 3031 | 1447 | 1869 | 1530 |
| NM_007174    | CIT       | 1449 | 1486 | 1314 | 1447 | 1572 | 2101 |
| NM_001896    | CSNK2A2   | 1340 | 1712 | 1039 | 1447 | 1321 | 321  |
| NM_033493    | CDK11B    | 1335 | 752  | 1360 | 1451 | 668  | 1058 |
| NM_145686    | MAP4K4    | 1786 | 2229 | 1397 | 1452 | 2121 | 997  |
| NM_014572    | LATS2     | 1406 | 1561 | 1615 | 1461 | 2218 | 1804 |
| NM_001128921 | MARK3     | 1459 | 922  | 1086 | 1463 | 1834 | 1061 |
| NM_025195    | TRIB1     | 604  | 471  | 522  | 1465 | 380  | 711  |
| NM_002958    | RYK       | 1127 | 1244 | 1847 | 1465 | 877  | 2469 |
| NM_133494    | NEK7      | 1303 | 1691 | 972  | 1477 | 361  | 876  |
| NM_012290    | TLK1      | 1197 | 112  | 1195 | 1480 | 1168 | 666  |
| NM_203351    | MAP3K3    | 2052 | 1394 | 1976 | 1484 | 1246 | 1974 |
| NM_145001    | STK32A    | 853  | 1565 | 1195 | 1486 | 801  | 506  |
| NM_003607    | CDC42BPA  | 705  | 2079 | 804  | 1488 | 887  | 1220 |
| NM_014496    | RPS6KA6   | 2173 | 1686 | 1745 | 1490 | 2398 | 2440 |
| NM_001079882 | PRKD2     | 1007 | 185  | 997  | 1491 | 606  | 326  |
| NM_005406    | ROCK1     | 896  | 1072 | 865  | 1503 | 707  | 859  |
| NM_004612    | TGFBR1    | 1755 | 1090 | 1213 | 1513 | 762  | 968  |
| NM_020630    | RET       | 843  | 1281 | 1562 | 1514 | 876  | 1207 |
| NM_003010    | MAP2K4    | 695  | 865  | 626  | 1517 | 520  | 412  |
| NM_001128921 | MARK3     | 1128 | 1912 | 1149 | 1518 | 979  | 1298 |
| NM_003160    | AURKC     | 2026 | 970  | 1203 | 1530 | 1879 | 896  |
| NM_015375    | DSTYK     | 2329 | 1396 | 2013 | 1539 | 1315 | 1640 |
| NM_198578    | LRRK2     | 1241 | 885  | 1946 | 1543 | 1439 | 1137 |
| XR_037003    | LOC283155 | 1047 | 972  | 1481 | 1544 | 946  | 48   |
| NM_015076    | CDK19     | 1065 | 1295 | 1378 | 1549 | 1269 | 1071 |
| NM_005246    | FER       | 879  | 770  | 1271 | 1550 | 1548 | 620  |
| NM_001136138 | RPS6KC1   | 1227 | 847  | 1530 | 1551 | 841  | 1119 |
| NM_001135740 | PNCK      | 1682 | 767  | 887  | 1558 | 1546 | 575  |
| NM_015112    | MAST2     | 559  | 497  | 748  | 1574 | 761  | 392  |

|              |          |      |      |      |      |      |      |
|--------------|----------|------|------|------|------|------|------|
| NM_182687    | PKMYT1   | 977  | 353  | 1225 | 1578 | 684  | 910  |
| NM_032960    | MAPKAPK2 | 2170 | 2133 | 2990 | 1581 | 2610 | 2303 |
| NM_001112808 | TNNI3K   | 1337 | 1084 | 570  | 1584 | 1125 | 1210 |
| NM_032028    | TSSK1B   | 1719 | 251  | 1037 | 1589 | 684  | 928  |
| NM_004734    | DCLK1    | 792  | 648  | 1604 | 1592 | 930  | 1228 |
| NM_004579    | MAP4K2   | 2272 | 3163 | 3011 | 1598 | 3556 | 2589 |
| NM_002613    | PDPK1    | 2262 | 2952 | 2437 | 1600 | 2794 | 1965 |
| NM_001222    | CAMK2G   | 2004 | 2119 | 1722 | 1617 | 2365 | 1571 |
| NM_181093    | SCYL3    | 1489 | 709  | 1378 | 1620 | 1484 | 3213 |
| NM_005906    | MAK      | 1794 | 2974 | 521  | 1630 | 1686 | 1232 |
| NM_014226    | RAGE     | 965  | 1584 | 1505 | 1631 | 1141 | 1794 |
| NM_001136138 | RPS6KC1  | 1070 | 501  | 1138 | 1633 | 610  | 787  |
| NM_002611    | PDK2     | 1477 | 1865 | 1981 | 1636 | 1911 | 2033 |
| NM_001261    | CDK9     | 2012 | 1819 | 1558 | 1639 | 1623 | 883  |
| NM_005569    | LIMK2    | 842  | 435  | 1040 | 1642 | 1028 | 321  |
| NM_015076    | CDK19    | 1784 | 2398 | 782  | 1648 | 2126 | 2095 |
| NM_001799    | CDK7     | 703  | 1167 | 927  | 1648 | 617  | 1070 |
| NM_001113575 | CDKL3    | 890  | 631  | 724  | 1651 | 692  | 1231 |
| NM_172206    | CAMKK1   | 1217 | 1590 | 1568 | 1655 | 2277 | 856  |
| NM_033493    | CDK11B   | 619  | 593  | 1408 | 1655 | 870  | 502  |
| NM_177560    | CSNK2A1  | 1088 | 675  | 736  | 1672 | 921  | 864  |
| NM_002742    | PRKD1    | 672  | 666  | 1306 | 1680 | 913  | 1264 |
| NM_001203    | BMPR1B   | 992  | 467  | 577  | 1682 | 484  | 296  |
| NM_001048200 | HIPK3    | 700  | 1435 | 846  | 1684 | 1393 | 644  |
| NM_021133    | RNASEL   | 1452 | 843  | 1536 | 1696 | 1798 | 2383 |
| NM_152649    | MLKL     | 1657 | 982  | 1546 | 1698 | 1103 | 1294 |
| NM_017771    | PXK      | 1670 | 1138 | 1321 | 1714 | 1716 | 2131 |
| NM_001954    | DDR1     | 1778 | 1323 | 1365 | 1739 | 1589 | 1455 |
| NM_032538    | TTBK1    | 2481 | 2691 | 1861 | 1743 | 1926 | 4181 |
| NM_033118    | MYLK2    | 1722 | 3622 | 2969 | 1743 | 1475 | 1195 |
| NM_003942    | RPS6KA4  | 1464 | 1613 | 1437 | 1745 | 1618 | 868  |
| NM_001005735 | CHEK2    | 1713 | 2551 | 1530 | 1759 | 2320 | 2054 |
| NM_178170    | NEK8     | 1480 | 1870 | 2495 | 1769 | 1082 | 1721 |
| NM_000208    | INSR     | 1627 | 1657 | 1878 | 1774 | 1562 | 2625 |
| NM_212535    | PRKCB    | 2025 | 1394 | 1800 | 1774 | 1776 | 633  |
| NM_052841    | TSSK3    | 1904 | 1893 | 1287 | 1778 | 1426 | 1110 |
| NM_031464    | RPS6KL1  | 1092 | 1636 | 764  | 1780 | 1304 | 513  |
| NM_021135    | RPS6KA2  | 1089 | 722  | 1857 | 1784 | 1727 | 1130 |
| NM_005160    | ADRBK2   | 818  | 1200 | 2190 | 1789 | 1138 | 1016 |
| NM_004690    | LATS1    | 960  | 679  | 1265 | 1793 | 996  | 1512 |
| NM_004721    | MAP3K13  | 666  | 1592 | 777  | 1797 | 677  | 1673 |
| NM_005157    | ABL1     | 2122 | 3526 | 2114 | 1798 | 2082 | 1674 |
| NM_002595    | CDK17    | 924  | 2551 | 697  | 1799 | 1164 | 2541 |
| NM_003845    | DYRK4    | 1846 | 2176 | 1928 | 1802 | 2683 | 1225 |
| NM_020630    | RET      | 1567 | 2131 | 1259 | 1809 | 2340 | 1365 |
| NM_032960    | MAPKAPK2 | 1599 | 1371 | 1933 | 1814 | 1608 | 2290 |
| NM_012224    | NEK1     | 1868 | 1810 | 1693 | 1817 | 1266 | 2608 |

|              |          |      |      |      |      |      |      |
|--------------|----------|------|------|------|------|------|------|
| NM_019884    | GSK3A    | 2874 | 1806 | 3271 | 1844 | 2686 | 2488 |
| NM_153498    | CAMK1D   | 1080 | 1792 | 749  | 1844 | 1557 | 1756 |
| NM_003913    | PRPF4B   | 1179 | 1485 | 1880 | 1848 | 1223 | 1077 |
| NM_003503    | CDC7     | 2214 | 1926 | 1226 | 1863 | 1379 | 1300 |
| NM_004217    | AURKB    | 1231 | 657  | 1366 | 1872 | 1069 | 1118 |
| NM_015905    | TRIM24   | 1399 | 1342 | 1859 | 1874 | 1291 | 2544 |
| NM_004690    | LATS1    | 1183 | 531  | 1426 | 1874 | 1224 | 755  |
| NM_005465    | AKT3     | 1235 | 1772 | 1675 | 1877 | 1544 | 1844 |
| NM_198268    | HIPK1    | 3113 | 3018 | 2888 | 1883 | 3016 | 3802 |
| NM_001006665 | RPS6KA1  | 606  | 632  | 1629 | 1884 | 530  | 1287 |
| NM_001721    | BMX      | 1299 | 1377 | 1000 | 1893 | 1236 | 2320 |
| NM_001042600 | MAP4K1   | 2135 | 2508 | 1551 | 1894 | 1544 | 1127 |
| NM_004119    | FLT3     | 1773 | 1390 | 2073 | 1896 | 1171 | 238  |
| NM_002093    | GSK3B    | 960  | 1614 | 1464 | 1912 | 1590 | 1643 |
| NM_001164690 | AMHR2    | 1536 | 1629 | 829  | 1939 | 1213 | 2161 |
| NM_017672    | TRPM7    | 440  | 1259 | 966  | 1945 | 1119 | 0    |
| NM_002595    | CDK17    | 1218 | 916  | 1505 | 1948 | 1393 | 2158 |
| NM_001715    | BLK      | 1464 | 1138 | 623  | 1953 | 902  | 906  |
| NM_139012    | MAPK14   | 853  | 1382 | 1702 | 1959 | 985  | 751  |
| NM_003215    | TEC      | 1121 | 1309 | 2042 | 1976 | 1254 | 1220 |
| NM_031267    | CDK13    | 1957 | 1187 | 1701 | 1978 | 1621 | 1316 |
| NM_001163297 | MARK2    | 1635 | 1098 | 1379 | 1979 | 1139 | 2788 |
| NM_133494    | NEK7     | 729  | 260  | 1102 | 1979 | 792  | 1389 |
| NM_001004106 | GRK6     | 1610 | 2390 | 1133 | 1989 | 1146 | 881  |
| NM_001172645 | TK2      | 1964 | 2370 | 1721 | 2007 | 1684 | 2012 |
| NM_001699    | AXL      | 1344 | 1906 | 1460 | 2009 | 1081 | 651  |
| NM_007174    | CIT      | 1251 | 1065 | 992  | 2012 | 1603 | 701  |
| NM_005781    | TNK2     | 1283 | 2755 | 1519 | 2022 | 1459 | 892  |
| NM_001113575 | CDKL3    | 1850 | 1543 | 771  | 2067 | 890  | 732  |
| NM_016653    | ZAK      | 2199 | 1479 | 948  | 2083 | 1599 | 1689 |
| NM_139034    | MAPK7    | 1965 | 1460 | 1240 | 2085 | 2902 | 2386 |
| NM_018571    | STRADB   | 2042 | 2296 | 713  | 2086 | 1582 | 1294 |
| NM_004612    | TGFBR1   | 2721 | 2202 | 2270 | 2087 | 2245 | 1596 |
| NM_020791    | TAOK1    | 1721 | 100  | 1069 | 2089 | 727  | 995  |
| NM_000455    | STK11    | 1272 | 3319 | 2101 | 2090 | 1519 | 1001 |
| NM_170663    | MINK1    | 1722 | 2290 | 1393 | 2093 | 1745 | 1451 |
| NM_145160    | MAP2K5   | 1032 | 497  | 1973 | 2102 | 873  | 660  |
| NM_003618    | MAP4K3   | 1339 | 608  | 764  | 2112 | 1006 | 787  |
| NM_182644    | EPHA3    | 1320 | 2381 | 1314 | 2122 | 2105 | 1830 |
| NM_006254    | PRKCD    | 2106 | 1725 | 1849 | 2127 | 2281 | 626  |
| NM_006343    | MERTK    | 1700 | 3813 | 2215 | 2134 | 2041 | 2314 |
| NM_032387    | WNK4     | 1106 | 630  | 844  | 2141 | 756  | 599  |
| NM_138292    | ATM      | 1632 | 502  | 1794 | 2151 | 1282 | 1921 |
| NM_004440    | EPHA7    | 1732 | 2949 | 774  | 2157 | 1795 | 2019 |
| NM_139078    | MAPKAPK5 | 1296 | 1713 | 1254 | 2157 | 1722 | 1508 |
| NM_001211    | BUB1B    | 1263 | 509  | 1207 | 2173 | 814  | 1666 |
| NM_031480    | RIOK1    | 827  | 1706 | 1520 | 2176 | 755  | 1364 |

|              |          |      |      |      |      |      |      |
|--------------|----------|------|------|------|------|------|------|
| NM_033126    | PSKH2    | 2782 | 1867 | 2562 | 2185 | 3347 | 3012 |
| NM_152720    | NEK3     | 1791 | 582  | 2538 | 2188 | 1622 | 2879 |
| NM_207578    | PRKACB   | 2997 | 3932 | 2862 | 2199 | 2177 | 2794 |
| NM_005109    | OXSRI    | 976  | 1619 | 1369 | 2234 | 1016 | 1767 |
| NM_000455    | STK11    | 1244 | 947  | 1077 | 2246 | 954  | 1104 |
| NM_003995    | NPR2     | 1938 | 1822 | 1921 | 2248 | 1936 | 986  |
| NM_001014796 | DDR2     | 3478 | 4649 | 3320 | 2250 | 3493 | 2186 |
| NM_004734    | DCLK1    | 893  | 1733 | 544  | 2254 | 647  | 735  |
| NM_004958    | MTOR     | 2046 | 2470 | 2001 | 2270 | 2120 | 1196 |
| NM_000061    | BTK      | 1695 | 1034 | 1077 | 2278 | 1204 | 833  |
| NM_001184    | ATR      | 1567 | 2703 | 1839 | 2297 | 1954 | 1528 |
| NM_014326    | DAPK2    | 2135 | 3218 | 3101 | 2301 | 3604 | 3326 |
| NM_005012    | ROR1     | 1564 | 1245 | 1752 | 2309 | 1652 | 1653 |
| NM_002944    | ROS1     | 2023 | 1133 | 1387 | 2313 | 2217 | 1719 |
| NM_003177    | SYK      | 1722 | 3987 | 2908 | 2319 | 1980 | 1460 |
| NM_001100594 | SNRK     | 685  | 974  | 628  | 2319 | 794  | 733  |
| NM_001556    | IKBKB    | 1385 | 3703 | 1898 | 2327 | 1394 | 1094 |
| NM_153047    | FYN      | 1570 | 330  | 1717 | 2351 | 1683 | 1443 |
| NM_198465    | NRK      | 2749 | 2461 | 3254 | 2361 | 3242 | 4203 |
| NM_006213    | PHKG1    | 1616 | 1828 | 1172 | 2387 | 1486 | 1794 |
| NM_003565    | ULK1     | 1472 | 1797 | 866  | 2389 | 1998 | 1188 |
| NM_001024401 | SBK1     | 1935 | 1250 | 2186 | 2391 | 1929 | 1215 |
| NM_001004106 | GRK6     | 714  | 2506 | 2230 | 2468 | 1368 | 1938 |
| NM_005813    | PRKD3    | 2716 | 2204 | 2591 | 2489 | 2616 | 4108 |
| NM_006875    | PIM2     | 2196 | 1822 | 1887 | 2498 | 1661 | 471  |
| NM_139158    | CDK15    | 1080 | 1024 | 1855 | 2503 | 1058 | 1143 |
| NM_006343    | MERTK    | 1772 | 3071 | 1407 | 2560 | 1955 | 2116 |
| NM_001025105 | CSNK1A1  | 1619 | 1298 | 1057 | 2564 | 1452 | 2447 |
| NM_017988    | SCYL2    | 3171 | 2408 | 2389 | 2598 | 2323 | 1728 |
| NM_004336    | BUB1     | 1605 | 1818 | 1749 | 2600 | 1451 | 2156 |
| NM_003159    | CDKL5    | 2052 | 1918 | 1274 | 2608 | 1147 | 2362 |
| NM_032435    | KIAA1804 | 1696 | 1148 | 1901 | 2614 | 1197 | 1292 |
| NM_000294    | PHKG2    | 1589 | 1838 | 1923 | 2619 | 2277 | 1260 |
| NM_006301    | MAP3K12  | 3057 | 1853 | 1930 | 2622 | 1942 | 2674 |
| NM_001122833 | STK31    | 613  | 614  | 546  | 2622 | 1552 | 1095 |
| NM_030662    | MAP2K2   | 2717 | 2451 | 2074 | 2636 | 3421 | 3796 |
| NM_001004057 | GRK4     | 2367 | 778  | 1487 | 2661 | 1251 | 2713 |
| NM_001135685 | LTK      | 2269 | 2031 | 1990 | 2684 | 2079 | 2186 |
| NM_002741    | PKN1     | 1866 | 3338 | 2336 | 2692 | 2099 | 2390 |
| NM_004438    | EPHA4    | 2801 | 3948 | 1731 | 2718 | 2677 | 3858 |
| NM_005400    | PRKCE    | 2043 | 2638 | 1938 | 2727 | 1832 | 1797 |
| NM_003242    | TGFBR2   | 3291 | 3415 | 2330 | 2748 | 2775 | 2426 |
| NM_001009565 | CDKL4    | 1152 | 2190 | 1336 | 2748 | 1668 | 737  |
| NM_001100594 | SNRK     | 1610 | 712  | 1727 | 2790 | 1864 | 821  |
| NM_173500    | TTBK2    | 1829 | 2009 | 2548 | 2808 | 2041 | 3565 |
| NM_145001    | STK32A   | 2869 | 1120 | 2173 | 2818 | 2254 | 2918 |
| NM_032430    | BRSK1    | 950  | 2155 | 1276 | 2820 | 1482 | 1270 |

|              |          |      |      |      |      |      |      |
|--------------|----------|------|------|------|------|------|------|
| NM_001721    | BMX      | 3088 | 2827 | 2206 | 2848 | 2357 | 1873 |
| NM_005204    | MAP3K8   | 1526 | 1496 | 1259 | 2895 | 1715 | 1697 |
| NM_001004057 | GRK4     | 1831 | 1384 | 774  | 2899 | 1576 | 1801 |
| NM_001128628 | PAK6     | 1459 | 1215 | 1779 | 2916 | 1924 | 1574 |
| NM_013254    | TBK1     | 2894 | 2890 | 1932 | 2921 | 2398 | 3766 |
| NM_006609    | MAP3K2   | 990  | 1945 | 2533 | 2929 | 1362 | 1872 |
| NM_005109    | OXR1     | 2250 | 1525 | 2538 | 2940 | 1453 | 2390 |
| NM_004935    | CDK5     | 1204 | 3008 | 1295 | 2956 | 2267 | 3053 |
| NM_002821    | PTK7     | 2615 | 2947 | 2445 | 2983 | 2738 | 1233 |
| NM_004327    | BCR      | 1748 | 739  | 1432 | 2998 | 1335 | 2220 |
| NM_032237    | SGK196   | 3072 | 2282 | 1659 | 3102 | 2184 | 2174 |
| NM_002497    | NEK2     | 3093 | 3673 | 3126 | 3147 | 2594 | 2633 |
| NM_018979    | WNK1     | 2735 | 3769 | 3193 | 3218 | 2083 | 5554 |
| NM_000294    | PHKG2    | 2782 | 2845 | 2378 | 3219 | 2730 | 1612 |
| NM_004963    | GUCY2C   | 1398 | 2467 | 1465 | 3244 | 2114 | 2525 |
| NM_001005862 | ERBB2    | 1517 | 2063 | 1536 | 3255 | 1970 | 2055 |
| NM_006301    | MAP3K12  | 1058 | 1868 | 2389 | 3337 | 1620 | 2308 |
| NM_001143784 | FES      | 1548 | 3020 | 1546 | 3367 | 2399 | 2377 |
| NM_138980    | MAPK10   | 1617 | 2680 | 1652 | 3397 | 1792 | 1282 |
| NM_031417    | MARK4    | 1438 | 2807 | 2405 | 3417 | 1556 | 1745 |
| NM_001013703 | EIF2AK4  | 1964 | 2749 | 1848 | 3423 | 1499 | 1039 |
| NM_001348    | DAPK3    | 1580 | 1161 | 1286 | 3460 | 2068 | 2478 |
| NM_080823    | SRMS     | 2841 | 2390 | 2573 | 3512 | 2052 | 2451 |
| NM_004579    | MAP4K2   | 905  | 909  | 1864 | 3514 | 1580 | 1331 |
| NM_207518    | PRKACA   | 2650 | 3333 | 3190 | 3568 | 2235 | 2024 |
| NM_139209    | GRK7     | 2284 | 2845 | 2476 | 3598 | 3224 | 1783 |
| NM_023108    | FGFR1    | 2291 | 2165 | 2517 | 3702 | 2135 | 4860 |
| NM_001744    | CAMK4    | 4260 | 3155 | 2355 | 3714 | 4128 | 2976 |
| NM_133494    | NEK7     | 1846 | 1634 | 2143 | 3760 | 2116 | 2085 |
| NM_152221    | CSNK1E   | 2128 | 1204 | 3250 | 3795 | 2180 | 3458 |
| NM_017525    | CDC42BPG | 1419 | 1788 | 1199 | 3819 | 1758 | 3063 |
| NM_001142386 | PDK3     | 1657 | 1130 | 1669 | 3948 | 1280 | 1409 |
| NM_001143976 | WEE1     | 1410 | 2431 | 1518 | 4272 | 1581 | 1764 |
| NM_001079882 | PRKD2    | 1935 | 2732 | 1974 | 4355 | 1880 | 2697 |
| NM_001040261 | DCLK2    | 2271 | 2951 | 1189 | 4375 | 1682 | 2526 |
| NM_002969    | MAPK12   | 2449 | 3490 | 3529 | 4446 | 2875 | 3449 |
| NM_015375    | DSTYK    | 5810 | 4431 | 3538 | 4450 | 4496 | 9366 |
| NM_001126054 | CASK     | 5545 | 5900 | 4201 | 4495 | 4636 | 5622 |
| NM_002612    | PDK4     | 4113 | 2028 | 3818 | 4768 | 5217 | 5085 |
| NM_005465    | AKT3     | 1386 | 3276 | 2439 | 5101 | 1817 | 2133 |
| NM_004938    | DAPK1    | 3224 | 3657 | 1938 | 6140 | 3676 | 3875 |
