# Supplementary material for: Identification of synthetic lethality of PRKDC in MYC-dependent human cancers by pooled shRNA screening
Source: PubMed Central journal article supplement (PMC4320452; doi:10.1186/1471-2407-14-944), 2014-12-13

**A**

|                                | cell line | NU7441<br>IC <sub>50</sub> (μM) | KU0060648<br>IC <sub>50</sub> (μM) |
|--------------------------------|-----------|---------------------------------|------------------------------------|
| <i>high MYC<br/>expression</i> | EB1       | 1.71                            | 1.02                               |
|                                | MC116     | 0.64                            | 0.54                               |
|                                | SU-DHL-10 | 0.53                            | 0.95                               |
|                                | Namalwa   | 3.17                            | 1.69                               |
|                                | Daudi     | 1.44                            | 1.04                               |
|                                | Raji      | 2.36                            |                                    |
|                                | A4/Fukuda | 2.18                            | 0.7                                |
|                                | WSU-DLCL2 | 0.85                            | 0.43                               |
|                                | OCI-Ly3   | 5.9                             | 2.34                               |
|                                | DEL       | 3.49                            | 2.15                               |
| <i>low MYC<br/>expression</i>  | HUT-102   | 8                               | 1.67                               |
|                                | L428      | 3.22                            | 2.7                                |
|                                | SR786     | 5.39                            |                                    |
|                                | HS604T    | 10                              | 7.02                               |
|                                | HS616T    | 37.75                           | 10.29                              |
|                                | TO175T    | 28.47                           | 31.8                               |

**B**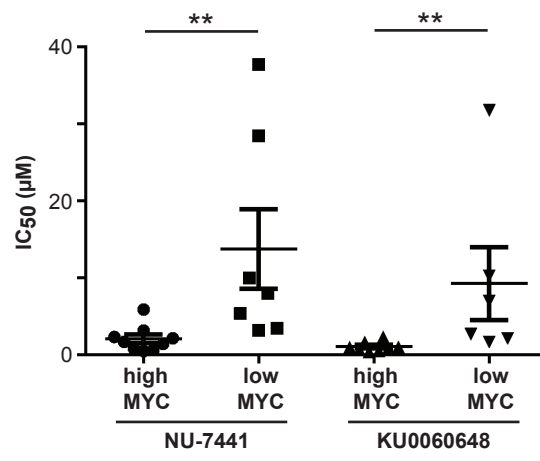

Supplement: 12885_2014_5171_MOESM3_ESM.pdf [file 12885_2014_5171_MOESM3_ESM.pdf]
