# Supplementary material for: Identification of synthetic lethality of PRKDC in MYC-dependent human cancers by pooled shRNA screening
Source: PubMed Central journal article supplement (PMC4320452; doi:10.1186/1471-2407-14-944), 2014-12-13

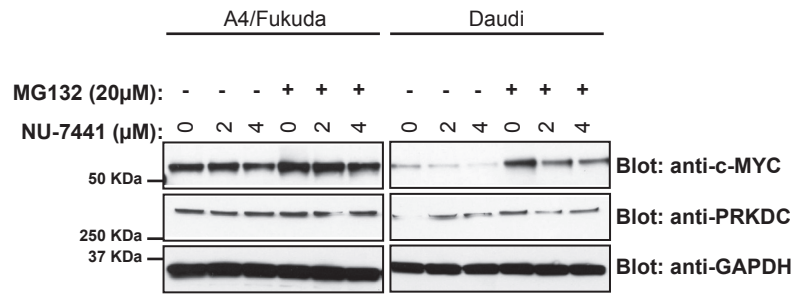

Supplement: 12885_2014_5171_MOESM4_ESM.pdf [file 12885_2014_5171_MOESM4_ESM.pdf]
